# Supplementary material
Source: Springer Nature journal article supplement (https://www.springermedizin.de/resource/supplementary/12908_2009_87_MOESM5_ESM.pdf/9525110)
Supplement: MOESM5 [file 9525110]

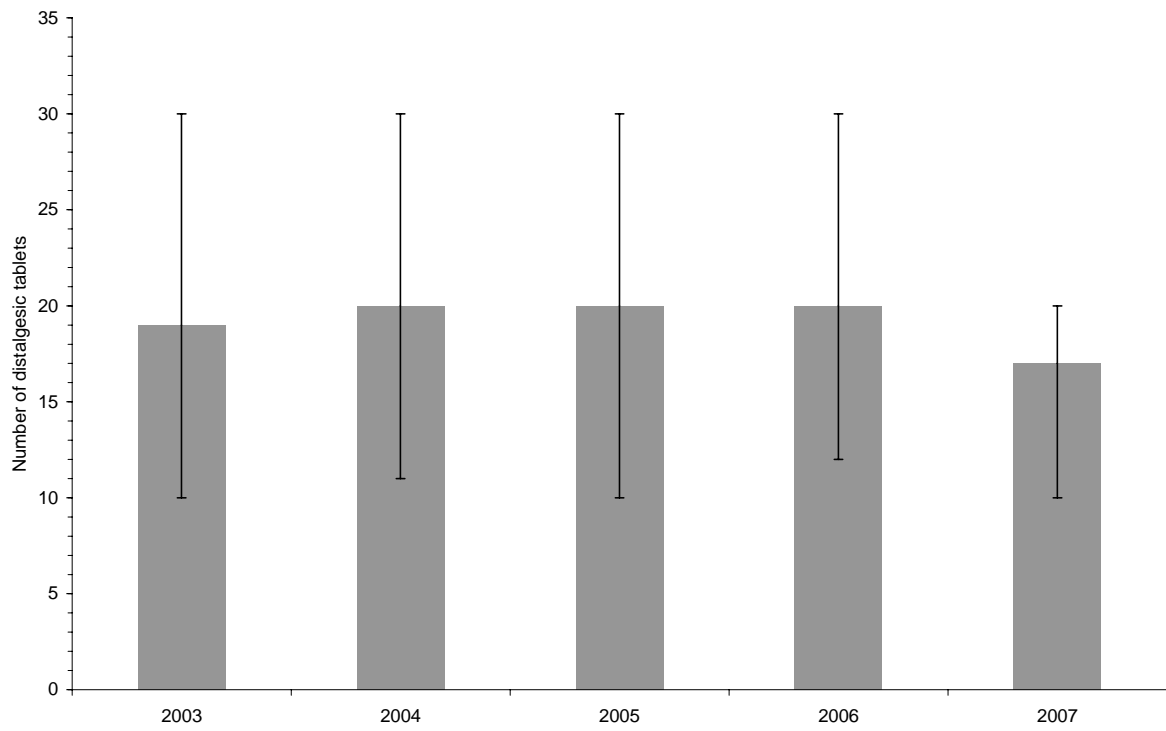

Figure 4. Median number of distalgesic tablets taken in intentional drug overdose presentations to hospital in Ireland, 2003-2007

Note: Error bars represent the interquartile range.
